# Supplementary material
Source: PubMed Central journal article supplement (PMC2190753)
Supplement: NIHMS36812-supplement-supplement.pdf [file NIHMS36812-supplement-supplement.pdf]

Supplemental Data

Acquisition of a functional T cell receptor during T lymphocyte development is enforced by HEB and E2A transcription factors

Mary Elizabeth Jones and Yuan Zhuang

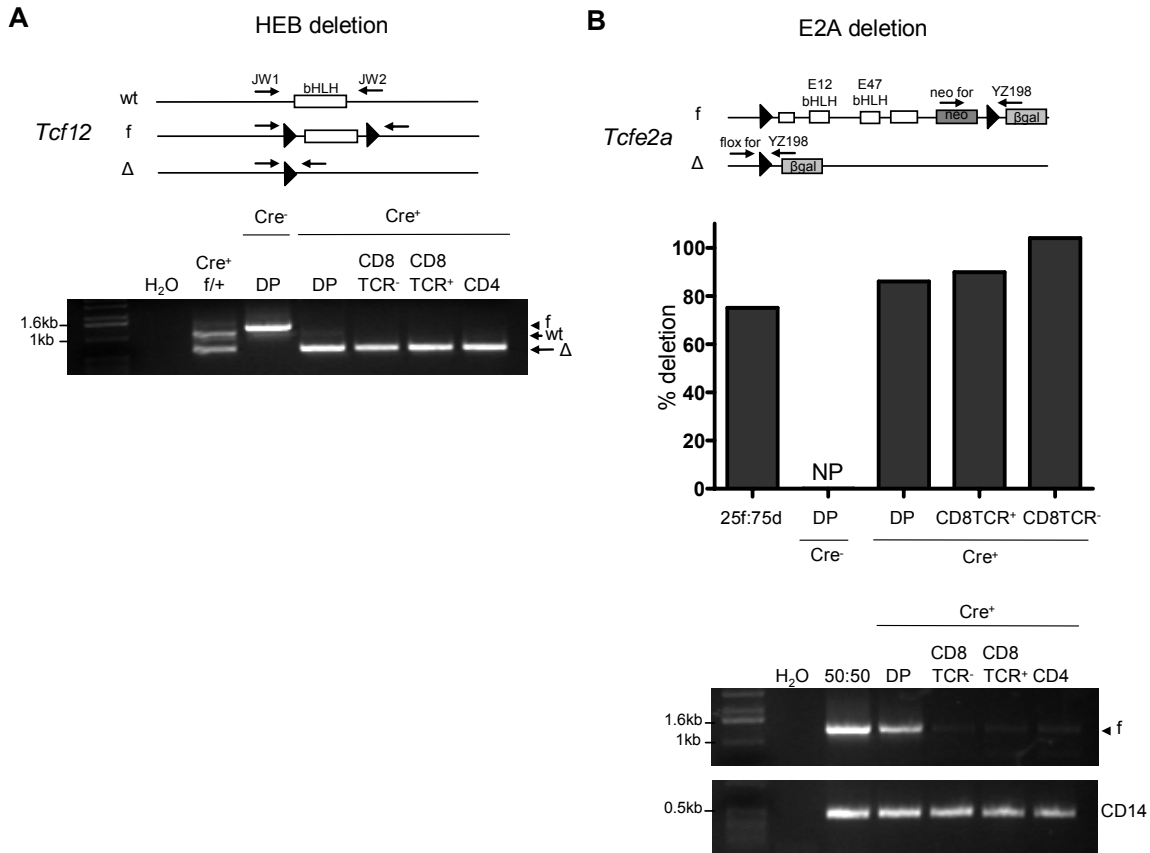

**Figure S1. HEB and E2A are efficiently deleted in DP stage of development.** Analysis of deletion efficiency in sorted populations (DP cells from thymus, CD8 and CD4 cells from LN) from *Tcf12<sup>fl/fl</sup>Tcfe2a<sup>fl/fl</sup>CD4Cre<sup>+</sup>* and *Tcf12<sup>fl/fl</sup>Tcfe2a<sup>fl/fl</sup>CD4Cre<sup>-</sup>* control mice. Primer design designated in diagrams for wild-type (wt), flox (f), and deleted (Δ) alleles (Wojciechowski et al., 2007). CD4 LN cells (Cre<sup>+</sup> f/+) from a *Tcf12<sup>fl/fl</sup>CD4Cre<sup>+</sup>* mouse were used as a control for 50% deletion. (B) E2A deletion. Primers neo for and YZ198 detect the flox allele, and primers flox for and YZ198 detect the deleted allele (Lazorchak et al., 2006). E2A deletion is analyzed by two independent methods because the difference in product size renders quantification of deletion difficult from a single PCR reaction. First, a qPCR method to detect %deletion is used with primers flox for and YZ198 as described previously (Lazorchak et al., 2006). A 25:75 mix of flox and deleted alleles, respectively, is used as a control for 75% deletion. Second, PCR for the flox allele only, using primers neo for and YZ198, at 40 cycles verifies qPCR results. A 50:50 mix of flox and deleted alleles is used as a control for 50% deletion. CD14 is used as a loading control. NP (no product).

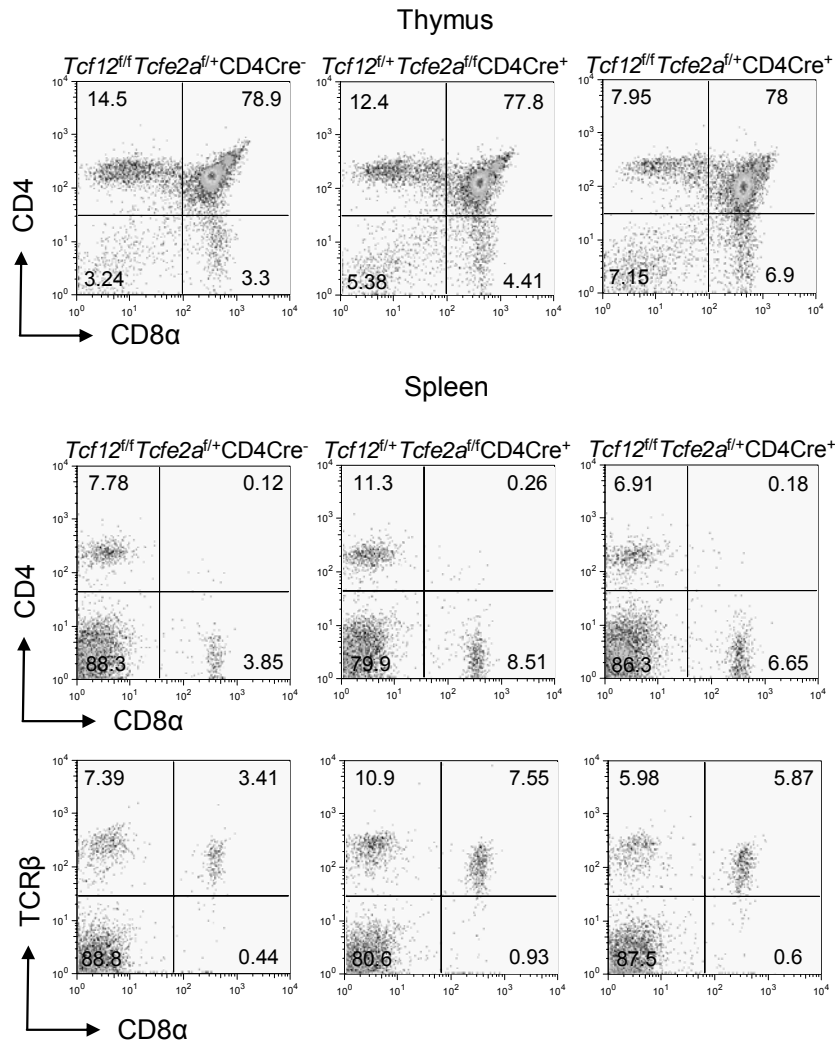

**Figure S2. CD8<sup>+</sup>TCR<sup>-</sup> cells are not detected in mice retaining one HEB or E2A wild-type allele.** Representative staining of indicated tissues from *Tcf12<sup>fl/fl</sup> Tcfe2a<sup>fl/+</sup> CD4Cre<sup>-</sup>* control, *Tcf12<sup>fl/+</sup> Tcfe2a<sup>fl/fl</sup> CD4Cre<sup>+</sup>*, and *Tcf12<sup>fl/fl</sup> Tcfe2a<sup>fl/+</sup> CD4Cre<sup>+</sup>* mice for CD4, CD8α, and TCRβ. Percentages in each quadrant are displayed.

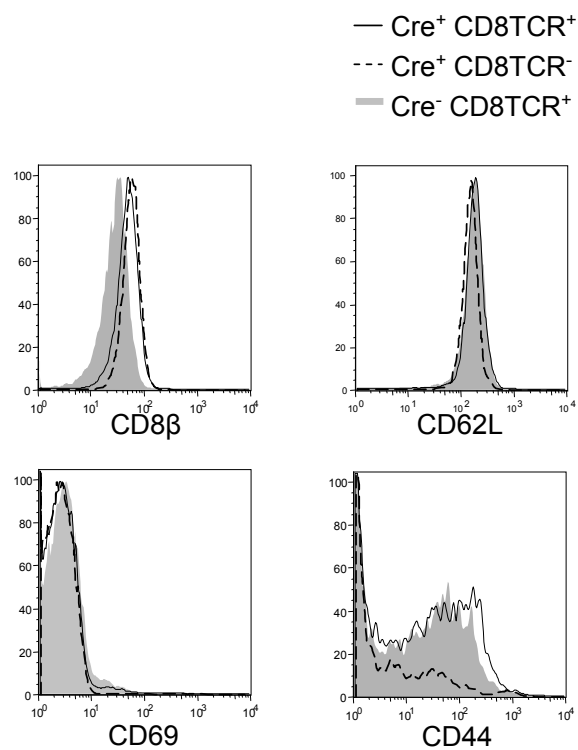

**Figure S3. Peripheral CD8TCR<sup>-</sup> cells demonstrate a mature resting T cell phenotype.**

Representative staining of LN cells from *Tcf12<sup>fl/fl</sup>Tcf2a<sup>fl/fl</sup>CD4Cre<sup>+</sup>* and *Tcf12<sup>fl/fl</sup>Tcf2a<sup>fl/fl</sup>CD4Cre<sup>-</sup>* mice. Cells are pre-gated on CD8α and TCRβ surface expression. Histograms display surface expression of CD8β, CD69, CD62L, and CD44 for Cre<sup>+</sup> CD8TCR<sup>+</sup> cells (solid line), Cre<sup>+</sup> CD8TCR<sup>-</sup> cells (dashed line), and Cre<sup>-</sup> CD8TCR<sup>+</sup> control cells (shaded).

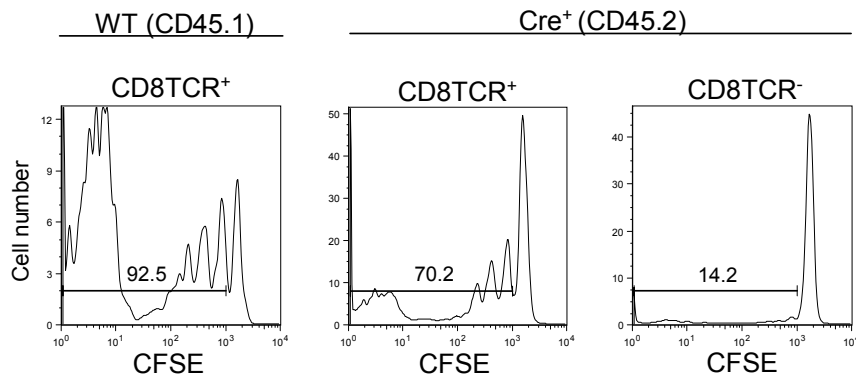

**Figure S4. HEB and E2A double deficient CD8TCR<sup>-</sup> cells demonstrate a defect in homeostatic proliferation when transferred to a lymphopenic host.** Total LN cells isolated from wild type (CD45.1) and *Tcf12<sup>fl/fl</sup>Tcfe2a<sup>fl/fl</sup>CD4Cre<sup>+</sup>* (CD45.2) mice were mixed at a 1:3 ratio, respectively, then labeled with 5uM CFSE (Molecular Probes). Approximately 10<sup>7</sup> mixed, CFSE-labeled cells were intravenously injected into *Rag2<sup>-/-</sup>* deficient hosts. FACS analysis on spleen cells was performed 7 days post transfer. CFSE histograms are gated on the CD45 congenic marker, CD8 $\beta$ , and TCR $\beta$  as labeled. Plots are representative of 3 independent transfers. Percentages of cells undergoing one or more division are shown.

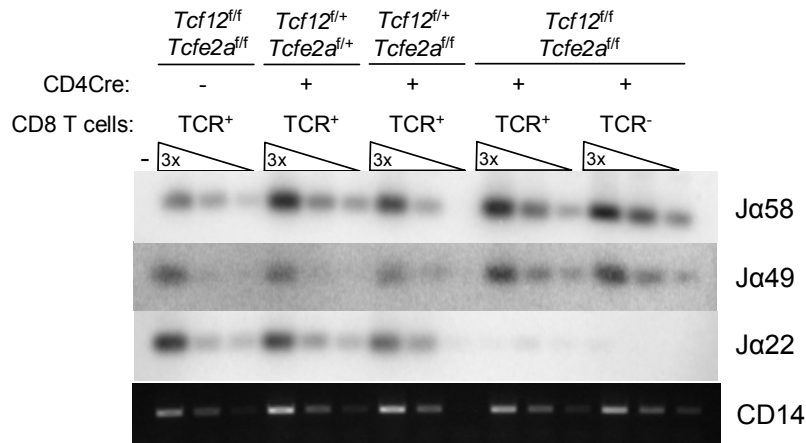

**Figure S5. *Tcf12<sup>fl/fl</sup>Tcfe2a<sup>fl/fl</sup>CD4Cre<sup>+</sup>* T cells demonstrate a skewing of J $\alpha$  usage to the 5' end of the locus.** Analysis of J $\alpha$  58, 49, and 22 usage in TCR $\alpha$  rearrangements from *Tcf12<sup>fl/fl</sup>Tcfe2a<sup>fl/fl</sup>CD4Cre<sup>-</sup>*, *Tcf12<sup>fl/+</sup>Tcfe2a<sup>fl/+</sup>CD4Cre<sup>+</sup>*, *Tcf12<sup>fl/+</sup>Tcfe2a<sup>fl/fl</sup>CD4Cre<sup>+</sup>*, and *Tcf12<sup>fl/fl</sup>Tcfe2a<sup>fl/fl</sup>CD4Cre<sup>+</sup>* sorted peripheral CD8 T cells. PCR and Southern blot analysis of V $\alpha$ 8 to J $\alpha$  rearrangements were done as described (Abarrategui and Krangel, 2006). CD14 was used as a DNA loading control. Water was used as a negative control (-). Results are from one mouse per genotype. J $\alpha$ 58, 49, and 22 are located 5' to 3' within the J $\alpha$  locus.

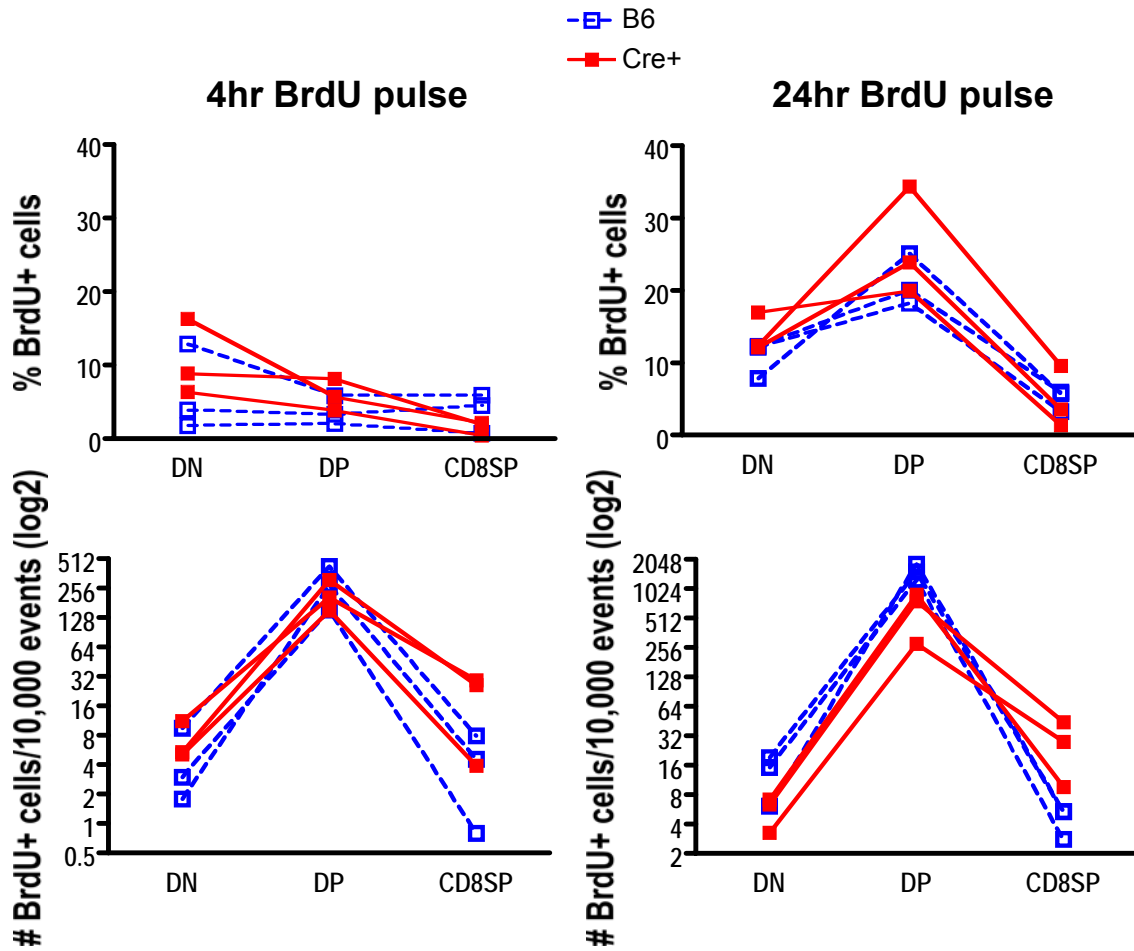

**Figure S6. In vivo BrdU labeling demonstrates generation of more CD8SP cells in *Tcf12<sup>fl/fl</sup>Tcfe2a<sup>fl/fl</sup>CD4Cre<sup>+</sup>* mice.** Wild-type (B6) and *Tcf12<sup>fl/fl</sup>Tcfe2a<sup>fl/fl</sup>CD4Cre<sup>+</sup>* mice were IP injected with 1mg BrdU and analyzed 4 or 24hrs after injection. Thymocytes were stained for CD4, CD8, and TCR $\beta$  surface expression, then processed to analyze BrdU labeling with a FITC BrdU Flow Kit as per manufacturer's instructions (BD Pharmingen). Graphs display percent (top panel) and cell number (lower panel) of BrdU<sup>+</sup> cells within each pre-gated population: DN (CD4<sup>-</sup>CD8<sup>-</sup>), DP (CD4<sup>+</sup>CD8<sup>+</sup>), and CD8SP (CD4<sup>-</sup>CD8<sup>+</sup>TCR $\beta$ <sup>+</sup>).

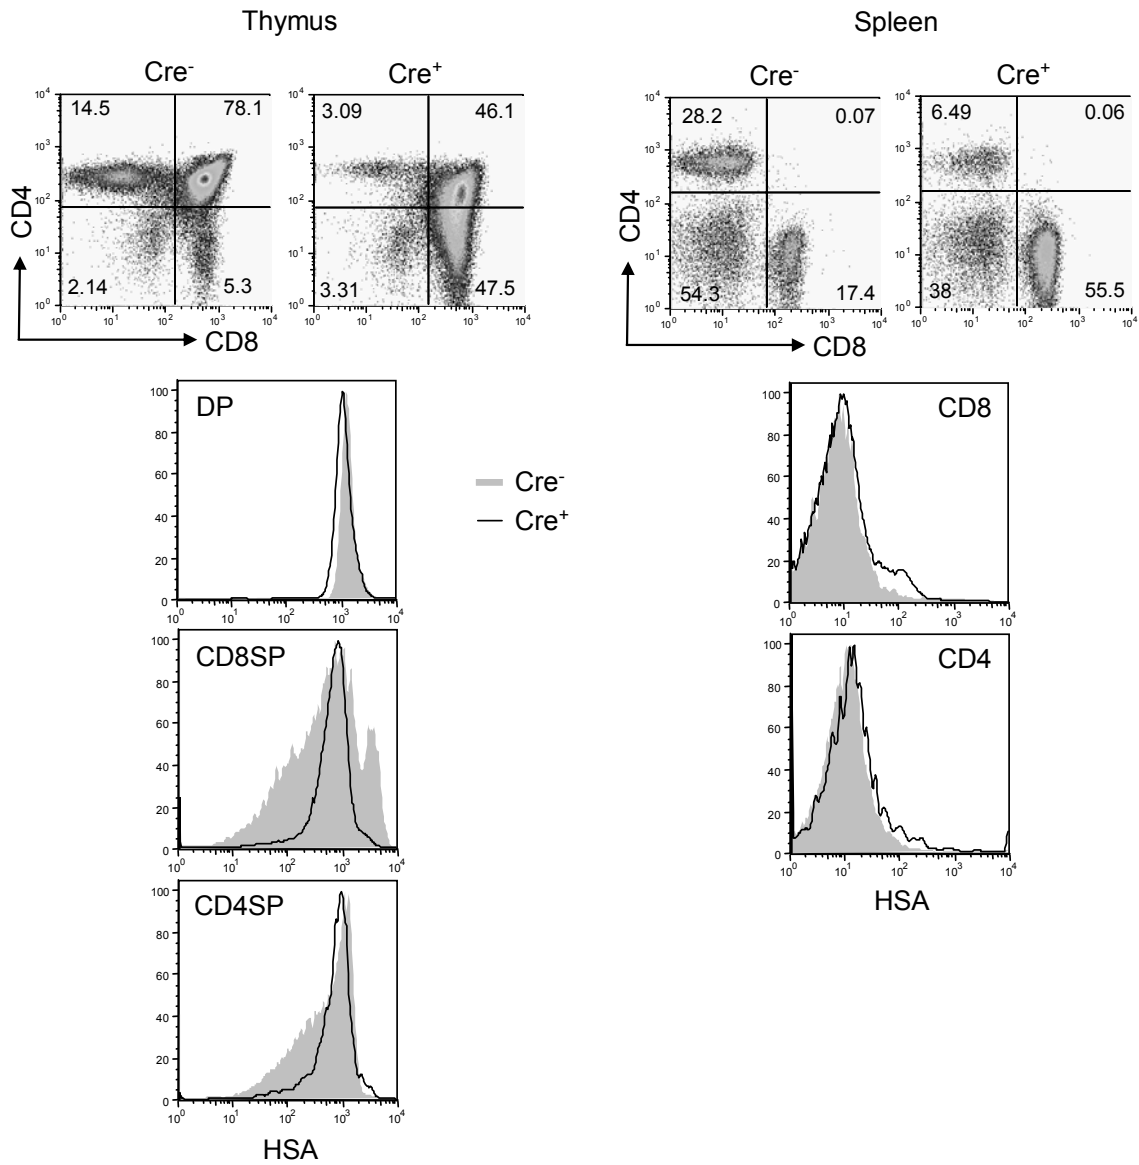

**Figure S7. *Tcf12<sup>fl/fl</sup>Tcfe2a<sup>fl/fl</sup>CD4Cre<sup>+</sup>* SP thymocytes have not yet down-regulated HSA expression to the levels detected in the periphery.** Staining of indicated tissues from *Tcf12<sup>fl/fl</sup>Tcfe2a<sup>fl/fl</sup>CD4Cre<sup>-</sup>* (shaded in histogram) and *Tcf12<sup>fl/fl</sup>Tcfe2a<sup>fl/fl</sup>CD4Cre<sup>+</sup>* (line in histogram) mice for expression of CD4, CD8, and HSA (clone M1/69). Percentages in each quadrant are displayed for CD4 vs CD8 plots. Histograms display HSA expression in gated populations from above plots: DP (CD4<sup>+</sup>CD8<sup>+</sup>), CD8SP/CD8 (CD4<sup>-</sup>CD8<sup>+</sup>), CD4SP/CD4 (CD4<sup>+</sup>CD8<sup>-</sup>).

**Table S1. List of microarray identified genes downregulated greater than 3 fold in *Tcf12<sup>f/f</sup>Tcfe2a<sup>f/f</sup>CD4Cre<sup>+</sup>* DP cells with a p-value  $\leq 0.05$** 

| Cre <sup>+</sup> /Cre <sup>-</sup><br>fold change | Ensembl         | Unigene   | Common Name                                                                                                  | Description                                                                           |
|---------------------------------------------------|-----------------|-----------|--------------------------------------------------------------------------------------------------------------|---------------------------------------------------------------------------------------|
| 0.0459                                            | Smoc1           | Mm.273295 | SRG; AI848508; 2600002F22Rik                                                                                 | SPARC related modular calcium binding 1                                               |
| 0.125                                             |                 | Mm.186434 | C43; Mf3; Twh; Fkh5; Foxb1a; Foxb1b; Hfh-e5.1; MGC130499                                                     | forkhead box B1                                                                       |
| 0.128                                             | Prodh           |           |                                                                                                              |                                                                                       |
| 0.13                                              |                 | Mm.48648  | KIAA0523; MGC55022; mKIAA0523; RP23-223C15.3                                                                 | cDNA sequence BC030477                                                                |
| 0.131                                             | Ppfbp2          | Mm.2817   | Cclp1; MGC117695                                                                                             | protein tyrosine phosphatase, receptor-type, F interacting protein, binding protein 2 |
| 0.145                                             | Olig3           | Mm.156946 | Bhlhb7                                                                                                       | oligodendrocyte transcription factor 3                                                |
| 0.149                                             | Rragd           |           |                                                                                                              |                                                                                       |
| 0.158                                             | Cbfa2t3h        |           |                                                                                                              |                                                                                       |
| 0.18                                              | Idb3            |           |                                                                                                              |                                                                                       |
| 0.182                                             | Car2            | Mm.1186   | CAII; Car-2; Ltw-5; Lvtw-5; AI131712                                                                         | carbonic anhydrase 2                                                                  |
| 0.182                                             | Tec             | Mm.319581 | Tsc2                                                                                                         | cytoplasmic tyrosine kinase, Dscr28C related (Drosophila)                             |
| 0.186                                             | Egr2            | Mm.290421 | Egr-2; Zfp-6; Krox20; NGF1-B; Zfp-25; Krox-20                                                                | early growth response 2                                                               |
| 0.187                                             |                 | Mm.330745 | kr; Krml; Krml1; Kreisler                                                                                    | v-maf musculoaponeurotic fibrosarcoma oncogene family, protein B (avian)              |
| 0.187                                             |                 | Mm.28456  | Pro1; Pro-1; Ym24d07                                                                                         | proline dehydrogenase                                                                 |
| 0.194                                             | Pip5k1a         |           |                                                                                                              |                                                                                       |
| 0.198                                             |                 | Mm.314618 | Zak; MLTK; AV006891; MLTKbeta; MLTKalpha                                                                     | RIKEN cDNA B230120H23 gene                                                            |
| 0.205                                             | Pip5k1a         |           |                                                                                                              |                                                                                       |
| 0.211                                             | Ephx2           | Mm.15295  | Eph2; AW106936                                                                                               | epoxide hydrolase 2, cytoplasmic                                                      |
| 0.216                                             | Lass4           |           |                                                                                                              |                                                                                       |
| 0.223                                             | Irf6            |           |                                                                                                              |                                                                                       |
| 0.225                                             | Plxdc1          | Mm.39617  | Tem7; AI848450; MGC130377; 2410003I07Rik                                                                     | plexin domain containing 1                                                            |
| 0.235                                             | Nab2            | Mm.336898 | AI451907                                                                                                     | Ngfi-A binding protein 2                                                              |
| 0.236                                             | Mad1l1          | Mm.27250  | Mad1; AI173502; AW550425                                                                                     | mitotic arrest deficient 1-like 1                                                     |
| 0.236                                             | Dusp6           |           |                                                                                                              |                                                                                       |
| 0.237                                             | Zdhhc14         |           |                                                                                                              |                                                                                       |
| 0.247                                             | Arl6ip2         |           |                                                                                                              |                                                                                       |
| 0.25                                              | Egr1            |           | egr; TIS8; Zenk; Egr-1; NGFIA; Zfp-6; ETR103; Krox-1; Krox24; NGF1-A; NGF1-A; Zif268; Krox-24; A530045N19Rik | early growth response 1                                                               |
| 0.26                                              | Hrb1            | Mm.260869 | RABR; MGC7148; MGC61203; A630095P14Rik                                                                       | HIV-1 Rev binding protein-like                                                        |
| 0.263                                             | D10Bwg094<br>Oe | Mm.297971 | BC013565; KIAA1357; mKIAA1357; A730096F01; D10Bwg0940e                                                       | NHS-like 1                                                                            |
| 0.269                                             |                 | Mm.38269  | LOC666794                                                                                                    | Similar to RNA binding motif protein 24                                               |
| 0.28                                              |                 | Mm.227912 | opt; Ip3r; P400; Pcp1; IP3R1; Pcp-1; D6Pas2; InsP3R; Itpr-1                                                  | inositol 1,4,5-triphosphate receptor 1                                                |
| 0.282                                             | Fbp1            | Mm.423078 | Fbp2; Fbp-2; FBpase 1                                                                                        | fructose biphosphatase 1                                                              |
| 0.283                                             | H2-D1           |           | Q10; Qa10; H-2Q10                                                                                            | histocompatibility 2, Q region locus 10                                               |
| 0.293                                             | Spg3a           |           |                                                                                                              |                                                                                       |
| 0.293                                             | Ets2            | Mm.290207 | Ets-2; AU022856                                                                                              | E26 avian leukemia oncogene 2, 3' domain                                              |
| 0.308                                             | Cdk1            |           |                                                                                                              |                                                                                       |
| 0.313                                             | Tle6            | Mm.206764 | Grg6; 1810057E06Rik                                                                                          | transducin-like enhancer of split 6, homolog of Drosophila E(spl)                     |
| 0.316                                             | Slc35d1         |           |                                                                                                              |                                                                                       |
| 0.331                                             | Rapgef3         | Mm.24028  | Epac; Epac1; MGC19192; 2310016P22Rik; 9330170P05Rik                                                          | Rap guanine nucleotide exchange factor (GEF) 3                                        |
| 0.332                                             | Socs3           | Mm.3468   | CIS3; Cish3; EF-10; SSI-3; SOCS-3                                                                            | suppressor of cytokine signaling 3                                                    |



**Table S2. List of microarray identified genes upregulated greater than 3 fold in *Tcf12<sup>f/f</sup>Tcfe2a<sup>f/f</sup>CD4Cre<sup>+</sup>* DP cells with a p-value  $\leq 0.05$**

| Cre <sup>+</sup> /Cre <sup>-</sup> fold change | Ensembl    | Unigene   | Common Name                                                            | Description                                                         |
|------------------------------------------------|------------|-----------|------------------------------------------------------------------------|---------------------------------------------------------------------|
| 15.13                                          | Ctla2b     |           |                                                                        |                                                                     |
| 11.4                                           | Rapgef4    | Mm.196153 | Epac2; KIAA4040; mKIAA4040; 1300003D15Rik; 5730402K07Rik               | Rap guanine nucleotide exchange factor (GEF) 4                      |
| 9.494                                          | Sgnel      |           |                                                                        |                                                                     |
| 8.523                                          | Tesc       |           |                                                                        |                                                                     |
| 8.285                                          | Elov16     | Mm.314113 | FAE; LCE; C77826; MGC107467                                            | ELOVL family member 6, elongation of long chain fatty acids (yeast) |
| 7.35                                           | Ctla2b     | Mm.30144  | Epb4.1l2                                                               | Erythrocyte protein band 4.1-like 2                                 |
| 6.854                                          |            | Mm.21814  | AU018597; 6720474K14Rik; 9430079M16Rik                                 | tetraspanin 9                                                       |
| 6.626                                          | Ccr7       | Mm.2932   | EBI1; CD197; Ebi1h; Cdw197; Cmkbr7                                     | chemokine (C-C motif) receptor 7                                    |
| 5.917                                          | Q8K244     |           |                                                                        |                                                                     |
| 5.754                                          |            | Mm.333048 | Ian1; IMAP4; mIAN1; AU019574; MGC11734; E430007K16Rik                  | GTPase, IMAP family member 4                                        |
| 5.499                                          | Cd53       |           |                                                                        |                                                                     |
| 5.448                                          | Pde3b      | Mm.430730 | AI847709                                                               | phosphodiesterase 3B, cGMP-inhibited                                |
| 5.39                                           |            | Mm.35548  | Clint1                                                                 | RIKEN cDNA A330049M08 gene                                          |
| 5.323                                          | Lix1       | Mm.268018 | 5730466L18Rik                                                          | limb expression 1 homolog (chicken)                                 |
| 5.296                                          | Ssb4       |           |                                                                        |                                                                     |
| 5.296                                          | Q9CZZ7     |           |                                                                        |                                                                     |
| 5.137                                          | Piwil2     | Mm.85253  | mili; Piwil1                                                           | piwi-like homolog 2 (Drosophila)                                    |
| 5.131                                          | Klf2       | Mm.26938  | Lklf                                                                   | Kruppel-like factor 2 (lung)                                        |
| 4.845                                          | Dncl2b     | Mm.23114  | Dynlrb2                                                                | Dynein light chain roadblock-type 2                                 |
| 4.789                                          | Mpra       |           |                                                                        |                                                                     |
| 4.754                                          | Gm2a       | Mm.287807 | AA408702; AW215435                                                     | GM2 ganglioside activator protein                                   |
| 4.621                                          | Q9CZY7     |           |                                                                        |                                                                     |
| 4.392                                          |            | Mm.31817  | EKNI; 1700010I24Rik                                                    | dyslexia susceptibility 1 candidate 1 homolog (human)               |
| 4.373                                          | Eng        | Mm.225297 | CD105; AI528660; S-endoglin                                            | endoglin                                                            |
| 4.332                                          | Cnn2       | Mm.157770 | AA408047; AI324678                                                     | calponin 2                                                          |
| 4.321                                          | Ank2       | Mm.220242 | Ank-2; AI835472; AW491075; Ankyrin-2; Ankyrin-B; ankyrin B; ankyrin>B< | ankyrin 2, brain                                                    |
| 4.284                                          | Add3       | Mm.426080 | R75380; AI463285                                                       | adducin 3 (gamma)                                                   |
| 4.264                                          | Rasa3      |           |                                                                        |                                                                     |
| 4.2                                            | Ggta1      |           |                                                                        |                                                                     |
| 4.174                                          | Pscd4      |           |                                                                        |                                                                     |
| 4.128                                          | Gng2       |           |                                                                        |                                                                     |
| 4.012                                          | Slc26a11   |           |                                                                        |                                                                     |
| 3.991                                          | Foxo1      | Mm.29891  | Afxh; FKHR; Fkhr1; Foxo1a; AI876417                                    | forkhead box O1                                                     |
| 3.929                                          | Pdlim1     |           |                                                                        |                                                                     |
| 3.846                                          | Q8BJ19     |           | AI225904; 1700108N18Rik; E430013J17Rik                                 | RIKEN cDNA 6330500D04 gene                                          |
| 3.824                                          | Scotin     | Mm.196533 | Scotin; 2310008D10Rik; 6430628I05Rik                                   | scotin gene                                                         |
| 3.772                                          | Rtn        |           |                                                                        |                                                                     |
| 3.766                                          | Gig1       |           | Gig1; C030026M03; C030034L19Rik                                        | zinc finger protein 704                                             |
| 3.752                                          |            | Mm.4065   | Eeig1; AI426465; MGC38572                                              | RIKEN cDNA C230093N12 gene                                          |
| 3.658                                          | Rps6ka1    | Mm.301827 | rsk; Rsk1; p90rsk                                                      | ribosomal protein S6 kinase polypeptide 1                           |
| 3.619                                          | Cst7       | Mm.12965  | Cst3                                                                   | Cystatin C                                                          |
| 3.582                                          | Chd3       | Mm.178246 | Chd7; Prp7; Prp9-1; AF020312; MGC40857; 2600010P09Rik                  | chromodomain helicase DNA binding protein 3                         |
| 3.572                                          | Rassf3     | Mm.41265  | AW212023; AW322379                                                     | Ras association (RalGDS/AF-6) domain family 3                       |
| 3.506                                          | Zfpn1a4    |           |                                                                        |                                                                     |
| 3.413                                          | Ian3       |           |                                                                        |                                                                     |
| 3.382                                          | Iitgb7     |           |                                                                        |                                                                     |
| 3.305                                          | Ly6c       |           |                                                                        |                                                                     |
| 3.288                                          | Ramp2      |           |                                                                        |                                                                     |
| 3.254                                          |            | Mm.393405 | Clp; 1810074P22Rik; 2010004C08Rik                                      | coactosin-like 1 (Dictyostelium)                                    |
| 3.236                                          | CNC2_MOUSE |           |                                                                        |                                                                     |
| 3.204                                          | CATW_MOUSE |           |                                                                        |                                                                     |
| 3.11                                           | Ms4a6d     | Mm.290390 | AI447446                                                               | membrane-spanning 4-domains, subfamily A, member 11                 |
| 3.067                                          | Chd3       |           |                                                                        |                                                                     |
| 3.064                                          | Hexb       | Mm.27816  | Hbb-b1                                                                 | hexosaminidase B                                                    |
| 3.01                                           | Tmsb4x     |           |                                                                        |                                                                     |

**Table S3.**

| Primers for RT-PCR: 5'-3' |                                 |
|---------------------------|---------------------------------|
| C $\alpha$ for            | ctg cct gtt cac cga ctt tga c   |
| C $\alpha$ rev            | gat tcg gag tcc cat aac tga cag |
| Gfi1 for                  | gat tcc acc aga agt cag         |
| Gfi1 rev                  | ggt agt gtt aca cag ctg gtg     |
| Mad1 F1                   | gct gac cgg cta cca gat tg      |
| Mad1 R1                   | gct cag gca cag acc gtg ag      |
| KLF2 F4                   | cct aca cca aga gct cgc acc     |
| KLF2 R4                   | gtc gac cca ggc tac atg         |
| Foxo1 F1                  | gga ctg tga cat gga gtc c       |
| Foxo1 R1                  | gga ctg ctc ctc agt tcc tg      |

### Supplemental Data References

Abarategui, I., Krangel, M.S. (2006). Regulation of T cell receptor- $\alpha$  gene recombination by transcription. *Nat Immunol* 7, 1109-1115.

Lazorchak, A. S., Wojciechowski, J., Dai, M., and Zhuang, Y. (2006). E2A promotes the survival of precursor and mature B lymphocytes. *J Immunol* 177, 2495-2504.

Wojciechowski, J., Lai, A., Kondo, M., and Zhuang, Y. (2007). E2A and HEB Are Required to Block Thymocyte Proliferation Prior to Pre-TCR Expression. *J Immunol* 178, 5717-5726.
